# Supplementary material
Source: PubMed Central journal article supplement (PMC2879811)
Supplement: pp.110.155465_1.pdf [file pp.110.155465_1.pdf]

**Supplemental Table SI.** Circadian period as measured by cotyledon movement in seedlings and by luciferase expression (*pCCA1:LUC*) in tissue culture.

| Genotype | Seedling Cotyledon Movement   |    | <i>Tissue Culture pCCA1:LUC</i> |    |
|----------|-------------------------------|----|---------------------------------|----|
|          | Period<br>(h; mean $\pm$ SEM) | n  | Period<br>(h; mean $\pm$ SEM)   | n  |
| R500     | 26.62 $\pm$ 0.35              | 6  | 25.60 $\pm$ 0.14                | 76 |
| IMB211   | 28.96 $\pm$ 0.26              | 8  | 26.39 $\pm$ 0.24                | 83 |
| RIL 136  | 23.09 $\pm$ 0.28              | 7  | 23.51 $\pm$ 0.38                | 13 |
| RIL 183  | 24.39 $\pm$ 1.01              | 7  | 23.67 $\pm$ 0.20                | 20 |
| RIL 102  | 25.16 $\pm$ 0.53              | 11 | 23.98 $\pm$ 0.24                | 14 |
| RIL 206  | 25.27 $\pm$ 0.83              | 6  | 25.28 $\pm$ 0.47                | 16 |
| RIL 294  | 25.21 $\pm$ 0.24              | 6  | 25.29 $\pm$ 0.31                | 10 |
| RIL 146  | 26.69 $\pm$ 0.43              | 5  | 25.72 $\pm$ 0.22                | 22 |
| RIL 066  | 28.85 $\pm$ 0.26              | 6  | 26.08 $\pm$ 0.20                | 19 |
| RIL 005  | 29.40 $\pm$ 0.24              | 6  | 26.93 $\pm$ 0.21                | 20 |
| RIL 329  | 29.41 $\pm$ 0.67              | 5  | 27.25 $\pm$ 0.18                | 12 |
| RIL 368  | 29.61 $\pm$ 1.11              | 6  | 27.92 $\pm$ 0.45                | 17 |

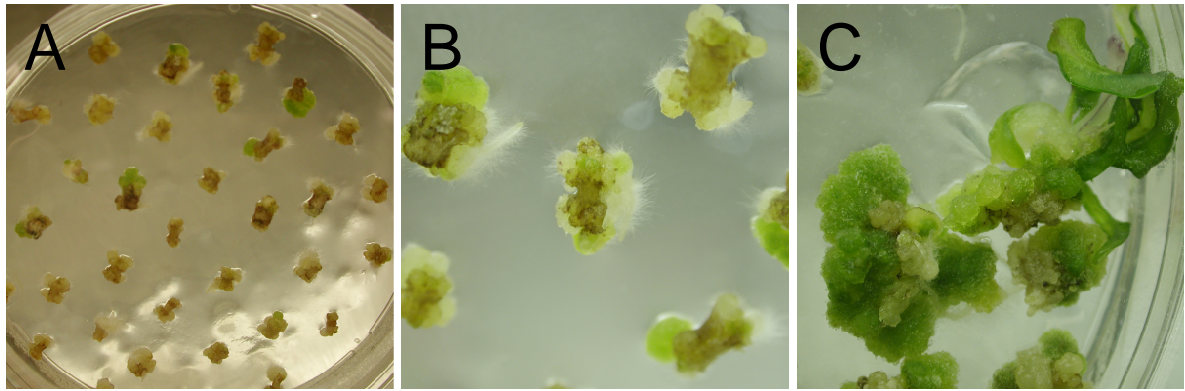

**Supplemental Figure S1.** *Brassica rapa* tissue culture.

*B. rapa* R500 hypocotyl explants after two weeks on callus induction medium showing resistance to basta. (B) Higher magnification view of callus from A. (C) Tissue culture after one month on organogenesis medium showing induction of shoots.
